# Supplementary material
Source: PubMed Central journal article supplement (PMC3314085)
Supplement: NIHMS361512-supplement-1_si_001.pdf [file NIHMS361512-supplement-1_si_001.pdf]

## Supporting Information

### Scalable imprinting of shape-specific polymeric nanocarriers using a release layer of switchable water solubility

*Rachit Agarwal<sup>1</sup>, Vikramjit Singh<sup>2</sup>, Patrick Journey<sup>2</sup>, Li Shi<sup>2</sup>, S. V. Sreenivasan<sup>2</sup>, Krishnendu Roy<sup>1\*</sup>*

<sup>1</sup>Department of Biomedical Engineering, The University of Texas at Austin, Austin, Texas 78712

<sup>2</sup>Department of Mechanical Engineering, The University of Texas at Austin, Austin, Texas 78712

Email: [\\*kroy@mail.utexas.edu](mailto:kroy@mail.utexas.edu)

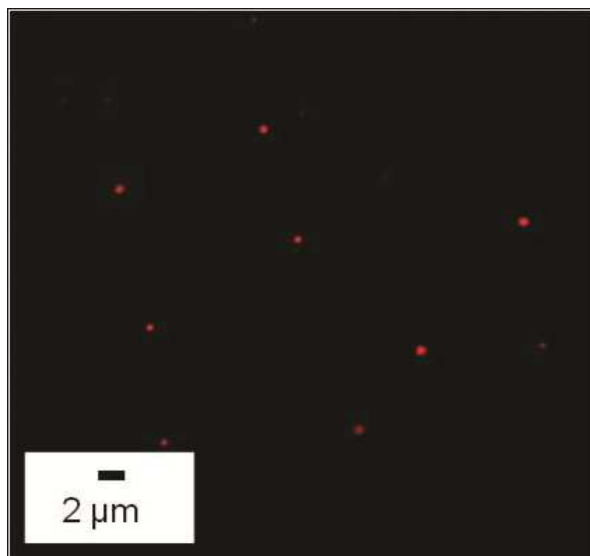

Figure S1: Fluorescence images of Doxorubicin containing 350 nm diameter x 120 nm height cylindrical particles imprinted with 55% PEGDA resist in DMSO over PAA, taken after 72 hours of dialysis in water.

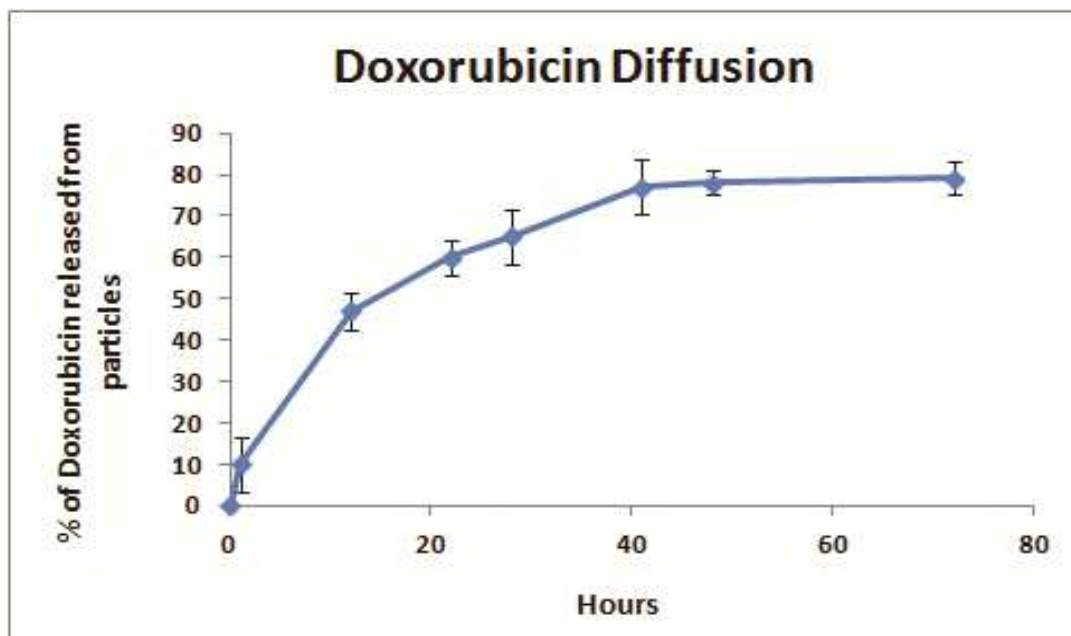

Figure S2: Kinetics of release of Doxorubicin from imprinted nanoparticles (350nm diameter x 120nm height) fabricated with 55% PEGDA resist in DMSO over PAA
